# Supplementary material
Source: Royal Society of Chemistry journal article supplement (https://www.rsc.org/suppdata/books/184973/9781849738132/bk9781849738132-00078/bk9781849738132-00078.pdf)
Supplement: Supplementary file 1 [file bk9781849738132-00078.pdf]

# *Exercises for Chapter 3*

HOWARD A. STONE AND CAMILLE DUPRAT

**Exercise 1.** Substitute eqn (3.3) into the right-hand side of eqn (3.2) and show that the magnitude of the net forcing is  $2\pi\mu V_0/(\ln \epsilon^{-1})^2$ . Then, make the equation nondimensional. For example, how should you scale  $z$  and  $u_s$ ? How do the typical fiber deformations vary with the fiber radius,  $\ell$ ,  $\ln \epsilon^{-1}$ ,  $B$ , and  $\mu$ ? *Answer:* See eqns (3.4) and (3.5).

**Exercise 2.** Verify that the rescalings shown in eqn (3.10) reduce eqn (3.9) to eqn (3.11).

**Exercise 3.** Verify that the variable  $\eta$  in eqn (3.29) is dimensionless, *i.e.*  $(B/\zeta_{\perp})^{1/4} t^{1/4}$  has dimensions of length. Also, verify that the similarity solution in eqn (3.29) reduces the original fourth-order PDE to the fourth-order ODE (3.30).

**Exercise 4.**

(i) Show that the problem in §3.3.2 has a similarity solution of the form

$$u(z, t) = v_0 t U(\eta), \quad \text{where} \quad \eta = \frac{z}{(B/\zeta_{\perp})^{1/4} t^{1/4}}. \quad (1)$$

(ii) Explain why the similarity variable has a dependence on  $t^{1/4}$ .

(iii) Find the ODE satisfied by  $U(\eta)$  and give sufficient boundary conditions for its solution.

**Exercise 5.** Carry out all of the steps to verify the solution given in §3.3.3 for a finite-length elastica.

**Exercise 6.**

- (i) Explain why nondimensionalization of the PDE and boundary conditions for the problem in §3.3.5 leads naturally to the definitions

$$T = \omega t, \quad Z = \frac{z}{\ell_B}, \quad \text{where } \ell_B = \left( \frac{B}{\omega \zeta_{\perp}} \right)^{1/4}, \quad U = \frac{u}{M_0 \ell_B^2 / B}. \quad (2)$$

- (ii) Conclude that the corresponding nondimensional problem statement is

$$\frac{\partial^4 U}{\partial Z^4} = -\frac{\partial U}{\partial T}, \quad \text{with } U(0, T) = 0, \quad \frac{\partial^2 U}{\partial Z^2}(0, T) = \cos T, \quad U(\infty, T) \rightarrow 0. \quad (3)$$

- (iii) Show that the time-periodic solution can be written

$$U(Z, T) = \Re \{ e^{iT} W(Z) \}, \quad \text{where } W'''' = -iW, \quad (4)$$

and solve for  $W(Z)$  using steps and algebra similar to those in the problem discussed in §3.3.4.
